1 Title: Disruption of Zika virus xrRNA1-dependent sfRNA1 production results in tissue-specific  
2 attenuated viral replication

3

4 Hadrian Sparks<sup>1</sup>, Brendan Monogue<sup>1</sup>, Benjamin Akiyama<sup>3</sup>, Jeffrey S. Kieft<sup>3,4</sup>, J. David  
5 Beckham<sup>1,2\*</sup>

6

7 <sup>1</sup>Department of Immunology & Microbiology, University of Colorado Anschutz Medical Campus,  
8 Aurora, CO, 80045, USA

9 <sup>2</sup>Department of Medicine, Division of Infectious Diseases University of Colorado School of  
10 Medicine, Aurora, CO 80045, USA

11 <sup>3</sup>Department of Biochemistry and Molecular Genetics and <sup>4</sup>RNA BioScience Initiative, University  
12 of Colorado Denver School of Medicine, Aurora, Colorado, 80045, USA

13

14 \*To Whom Correspondence should be addressed:

15

16 J. David Beckham  
17 Department of Immunology and Microbiology  
18 University of Colorado Anschutz Medical Campus  
19 RC1N Mail Stop B8333  
20 Aurora, CO 80045  
21 Telephone 303-724-4652

22 Email: [David.Beacham@cuanschutz.edu](mailto:David.Beacham@cuanschutz.edu)

23

24 Running Head: Tissue-dependent attenuated replication of xrRNA1 mutant Zika virus

25

26 Key words: Zika virus, flavivirus, RNA structure, non-coding RNA, replication, antibody

27 **Abstract**

28 Zika virus (ZIKV), like other flaviviruses, produces several species of sub-genomic RNAs  
29 (sfRNAs) during infection, corresponding to noncoding RNA fragments of different lengths derived  
30 from the viral 3' untranslated region (UTR). Over the course of infection, these sfRNAs  
31 accumulate in the cell as a result of incomplete viral genome degradation of the 3'UTR by host 5'  
32 to 3' exoribonuclease (Xrn1). The halting of Xrn1 in the 3'UTR is due to two RNA pseudoknot  
33 structures in the 3'UTR termed exoribonuclease-resistant RNA1 and 2 (xrRNA1&2). Studies with  
34 related flaviviruses have shown that sfRNAs are important for pathogenicity and inhibiting both  
35 mosquito and mammalian host defense mechanisms. However, these investigations have not  
36 included ZIKV and there is very limited data addressing how sfRNAs impact infection in a whole  
37 animal model or specific tissues. In this study, we rescued a sfRNA1-deficient ZIKV (X1) by  
38 targeted mutation in the xrRNA1 3' UTR structure. We found that virus which lacks the production  
39 of the largest ZIKV sfRNA species, sfRNA1. Using the X1 virus to infect adult *IFNAR1*<sup>-/-</sup> mice, we  
40 found that while the lack of sfRNA1 does not alter ZIKV replication in the spleen, there is a  
41 significant reduction of ZIKV genome replication in the brain and placenta compared to WT ZIKV  
42 infection. Despite the attenuated phenotype of the X1 ZIKV, mice develop a robust neutralizing  
43 antibody response. We conclude that targeted disruption of xrRNA1 results in tissue-specific  
44 attenuation while still supporting robust neutralizing antibody responses. Future studies will need  
45 to investigate the tissue-specific mechanisms by which ZIKV sfRNAs influence infection and may  
46 utilize targeted xrRNA mutations to develop novel attenuated flavivirus vaccine approaches.

47

48

## 49 **Introduction**

50 Arthropod-borne flaviviruses such as West Nile virus (WNV), dengue virus (DENV), and Japanese  
51 encephalitis virus (JEV) are important human pathogens. More recently, the Zika virus (ZIKV)  
52 pandemic and continued increase of tick-borne encephalitis virus infections emphasize the  
53 ongoing need to better define the mechanisms of flavivirus pathogenesis. The flavivirus genome  
54 is a positive-sense, single-stranded RNA encoding a 5' untranslated region (UTR), a single open  
55 reading frame (ORF), and a highly structured and conserved 3' UTR. One of these conserved  
56 RNA structures in the 3'UTR is known to inhibit degradation of viral RNA by host exoribonucleases  
57 [1]. These exoribonuclease-resistant RNAs (xrRNAs) form a pseudoknot structure dependent on  
58 a complex tertiary structure which protects the remaining 3' UTR and results in the accumulation  
59 of sub-genomic flaviviral RNAs (sfRNAs) during infection [1-3]. One or more xrRNAs and the  
60 biogenesis of sfRNAs has been identified for several flaviviruses including WNV, Murray Valley  
61 encephalitis virus (MVE), JEV, DENV, and ZIKV [1-5].

62 The specific role of sfRNAs during infection is not well-defined, especially *in vivo*. Recent  
63 *in vitro* studies have indicated that sfRNAs are important for limitation of cytoplasmic mRNA  
64 decay, induction of cell apoptosis, control of the mammalian host type I interferon (IFN) response,  
65 host switching, and inhibition of RNAi and Toll receptor pathways in arthropod hosts [2, 4, 6-11].  
66 Due to lack of structural data for flavivirus xrRNAs, many studies have relied on extensive  
67 modifications in the 3' UTR to completely eliminate the biogenesis of all sfRNA species. With the  
68 recent publication of detailed structural data for the first of two xrRNAs in ZIKV (xrRNA1), targeted  
69 mutations can now be utilized to disrupt RNA tertiary structure independent of major sequence  
70 changes in the 3' UTR [1]. Using this approach, we made specific mutations in xrRNA1 that disrupt  
71 the tertiary structure without significantly altering the 3'UTR sequence.

72 Our approach allows us to evaluate the function of individual sfRNAs while maintaining  
73 the sequence of sfRNAs. This strategy limits the potential for off-target effects due to significant  
74 sequence or structural alteration of the 3' UTR. Both, WNV and DENV produce multiple sfRNA  
75 species, largely in correlation to the number of xrRNAs encoded in the 3' UTR. Similarly, ZIKV  
76 generates two consistently observed species of sfRNAs (sfRNA1 and sfRNA2) due to the  
77 presence of two xrRNA structures (xrRNA1 and xrRNA2) within the 3' UTR. Despite this, only  
78 limited data has been presented investigating the role of individual sfRNA species. [2, 11, 12].  
79 Perhaps more importantly, the role of sfRNA production during ZIKV infection in the mouse model  
80 of disease is not known.

81 Here we use our previous structural data of ZIKV xrRNA1 tertiary structure to generate an  
82 infectious ZIKV clone in which a discrete, single nucleotide mutation eliminates the production of

83 sfRNA1 without significant changes to the 3' UTR sequence or structure. We show that loss of  
84 sfRNA1 does not impact viral growth in mammalian cells nor limits infection in mosquito cells. In  
85 type I interferon knockout mice, (*Ifnar1*<sup>-/-</sup>), ZIKV clones with the xrRNA1 mutation exhibited  
86 significantly decreased viral growth in the brain and placenta while still producing a robust  
87 neutralizing antibody response. These data show that sfRNA1 production plays a tissue-specific  
88 role in support of viral replication.

89

## 90 **Results**

91 **Development of an infectious ZIKV X1 mutant.** As previously described, a highly conserved  
92 cytosine (nt 10415) located in the P2' region of ZIKV xrRNA1 secondary structure is necessary  
93 for anti-exoribonuclease activity (Figure 1A). [1, 3, 5] In the tertiary structure of xrRNA1, this  
94 cytosine forms several bonds that stabilize the phosphate backbone kink essential to inhibiting  
95 degradation by host exoribonucleases (Figure 1B). Replacing C10415 with a guanine would be  
96 predicted to disrupt the tertiary structure of xrRNA1 without significantly altering the sequence  
97 (Figure 1C). We used site-directed mutagenesis to manipulate an infectious cDNA clone of Puerto  
98 Rican strain PRVABC59 and produce an infectious clone of the X1 mutant. Sanger sequencing  
99 confirmed the presence of the X1 mutation. To rescue infectious virus, Vero cells were transfected  
100 with RNA transcribed from the PRVABC59 clone with either the X1 mutation (X1) or no mutations  
101 (WT). Following transfection, we determined ZIKV genome copies present in the supernatant of  
102 transfected cells to evaluate X1 virus replication. We found that both WT and X1 transfections  
103 produced a mean of  $2.3 \times 10^9$  viral genome copies per  $\mu\text{L}$ , respectively with no significant  
104 difference between the WT and X1 clones (Figure 1E). Additionally, there was no significant  
105 difference in the amount of infectious WT and X1 virus as measured by a focus forming unit assay  
106 (FFU). In this assay, we found that the transfection of ZIKV produced  $1.7 \times 10^6$  FFU per mL of  
107 supernatant while X1 produced  $8.7 \times 10^5$  FFU per mL (Figure 1F). These results indicate that the  
108 X1 mutation did not significantly alter viral production after transfection and rescue of infectious  
109 clones.

110

111 **X1 mutation does not significantly alter viral growth *in vitro*.** To elucidate the sfRNA  
112 phenotype of our X1 infectious clone, the production of sfRNAs during infection was evaluated by  
113 northern blot of total RNA from infected A549 cells (Figure 2A) [1, 3]. When compared to cells  
114 infected with WT ZIKV, we determined that X1 virus only produces sfRNA2 and lacks any  
115 observable sfRNA1 production (fig 2A). Interestingly we observe that an sfRNA3 fragment  
116 becomes prominent upon loss of xrRNA1. This sfRNA3 band is likely generated by additional

117 unknown mechanisms within the infected cell, independent of the ability for xrRNA1 to resist  
118 exonucleolytic decay. Next, we inoculated human A549 cells and U4.4 cells (*Aedes albopictus*  
119 cells) with clone-derived X1 and WT viruses (Figure 2B-E). Confluent cells were infected at an  
120 MOI of 0.1 and supernatant was harvested at 0, 24, 48, and 72 hours post infection (HPI) to  
121 measure viral genome and infectious virus using RT-PCR and FFU, respectively. We found that  
122 extracellular ZIKV genome increased with similar kinetics over 72 hours following inoculation with  
123 X1 and WT clone-derived virus in A549 cells (2-way ANOVA,  $p=0.9423$  Figure 2B). Using viral  
124 titer as measured by FFU, we also found no significant difference in infectious virus titers over 72  
125 hours when comparing clone-derived X1 and WT viruses (2-way ANOVA,  $p=0.4603$  Figure 2C).  
126 However, in U4.4 cells, we observed that both X1 genome copies (2-way ANOVA,  $P=0.9134$   
127 Figure 2D) and infectious viral titer (2-way ANOVA,  $P=0.4782$ , Figure 2E) increased during  
128 infection, maintaining similar growth kinetics between time points.

129         These data demonstrate that the clone-derived X1 ZIKV results in loss of sfRNA1  
130 expression with a single nucleotide substitution, and loss of sfRNA1 production does not  
131 significantly alter viral growth in cultured A549 cells.

132

### 133 **X1 ZIKV is attenuated in adult *lfnar1*<sup>-/-</sup> mice and produces neutralizing antibody responses.**

134 Since the WT ZIKV infectious clone is attenuated in wild-type mice [13], we compared acute  
135 infection with X1, WT ZIKV, or the original clinical isolate PRVABC59 in adult *lfnar1*<sup>-/-</sup> mice. This  
136 model has been established as an important and relevant model of acute ZIKV infection in mice  
137 [14]. Moreover, infection of *lfnar1*<sup>-/-</sup> mice was previously shown to rescue the virulence of a WNV  
138 clone in which production of sfRNA1 and sfRNA2 was eliminated through several deletion and  
139 substitution mutations [10]. *lfnar1*<sup>-/-</sup> mice aged 5-7 weeks were inoculated by intraperitoneal (IP)  
140 injection with 10<sup>4</sup> FFU of X1, WT, or PRVABC59 ( $n=5$ ). To determine early viral load, we  
141 performed a retro-orbital bleed at 2 days post-infection (DPI) and measured the amount of ZIKV  
142 genome present in the serum via RT-qPCR. We found that all mice infected with PRVABC59 or  
143 WT ZIKV had quantifiable viral genome (10<sup>2</sup>-10<sup>3</sup> copies/ $\mu$ L serum) present with no significant  
144 difference between the two infections (Figure 3A). However, only 2 of the 5 mice infected with X1  
145 had measurable viral genome in the serum at 2 DPI (Figure 3A). Additionally, *lfnar1*<sup>-/-</sup> mice  
146 inoculated with the X1 mutant virus gained weight during acute infection with an average increase  
147 of 3.8% at 6 DPI (Figure 3B). This weight gain was significantly higher than mice infected with  
148 WT ZIKV or PRVABC59, which lost 3% and 1% body weight respectively at 6 DPI (2-way ANOVA,  
149  $P<0.05$ , Figure 3B). While some mice exhibited up to 6% weight loss during these studies, no  
150 difference in mortality was observed in any experimental group.

151 We also assessed the antibody response elicited by these infections at 20 DPI via indirect  
152 ELISA using purified ZIKV particles as antigen and a donkey anti-mouse IgG HRP conjugate  
153 antibody to detect ZIKV-reactive IgG in infected mouse sera by ELISA. We found that despite the  
154 attenuated phenotype of X1 ZIKV, the X1 ZIKV-inoculated adult *Ifnar1*<sup>-/-</sup> mice exhibited equivalent  
155 production of ZIKV-reactive IgG antibodies when compared to WT inoculated adult *Ifnar1*<sup>-/-</sup> mice  
156 (Figure 3C). Together, these results show that WT ZIKV and PRVABC59 produce similar acute  
157 infections while X1 exhibits attenuation while generating an antibody response comparable to WT  
158 ZIKV and PRVABC59 in *Ifnar1*<sup>-/-</sup> mice.

159

160 **X1 is attenuated in the CNS tissue of adult *Ifnar1*<sup>-/-</sup> mice.** Because X1 exhibited attenuated  
161 acute *in vivo* infection despite the lack of a functional type I IFN response, we sought to determine  
162 if this attenuation was more clearly observed in different tissues. Specifically, we investigated the  
163 impact of sfRNA1 deficiency on ZIKV infection of the brain in the absence of a type I IFN response.  
164 We inoculated adult *Ifnar1*<sup>-/-</sup> mice with 10<sup>4</sup> FFU (IP inoculation) of WT or X1 (*n*=6) then collected  
165 brain and spleen from both groups at 6 DPI. We found that X1 exhibits differential patterns of  
166 infection dependent on tissue. The spleens of *Ifnar1*<sup>-/-</sup> mice (5-7 weeks old) infected with either  
167 WT or X1 exhibited similar ZIKV genome copies at 6 DPI (1.6X10<sup>4</sup> genome copies/mg tissue,  
168 Mann-Whitney Test, *P*=0.3939, Figure 4A). However, in the brain we found that X1 exhibited a  
169 78% decrease in genome copies per mg of tissue compared to WT (Figure 4B). This decrease  
170 was significantly different and replicated across multiple repetitions of the experiment (Mann-  
171 Whitney Test, *P*=0.0022, Figure 4B). To further define this tissue-specific pattern of X1 ZIKV  
172 infection, we expanded the time frame of sample collection to include 4 and 8 DPI. Despite the  
173 differences in growth in the brain, we observed that both X1 and WT genome in the spleen peaked  
174 early during infection at 4 DPI with a mean of 3.6X10<sup>5</sup> genome copies per mg of tissue (Figure  
175 4C). Indeed, no significant differences in viral genome in the spleen were seen between X1 ZIKV  
176 and WT ZIKV at all time points (Figure 4C). Further reinforcing our findings at 6 DPI, we found a  
177 two-fold decrease in X1 ZIKV viral genome in brain tissue compared to WT ZIKV during early (4  
178 DPI) and later stages (8 DPI) of acute infection (\**p*=0.003, Two-way ANOVA, Figure 4D). Overall,  
179 X1 ZIKV is able to replicate the infection kinetics of WT ZIKV in the spleens of *Ifnar1*<sup>-/-</sup> mice but  
180 exhibits tissue-specific restriction in viral growth in brain tissue. These data indicate that the  
181 attenuation of X1 infection is specific to tissues and that this attenuation is not simply due to a  
182 temporal lag in X1 ZIKV infiltration of the CNS.

183



184 **X1 ZIKV replication is attenuated in the placenta of pregnant *lfnar1*<sup>-/-</sup> mice.** ZIKV vertical  
185 transmission to the placenta and fetal tissue are important complications of infection. To further  
186 define the impact of the X1 mutation on *in vivo* infection, we characterized X1 ZIKV infection in a  
187 pregnant mouse model. Superovulation was used to induce timed pregnancy in *lfnar1*<sup>-/-</sup> dams  
188 mated with *lfnar1*<sup>-/-</sup> sires ( $n=5$ , Figure 5A). Dams were infected at embryonic day 6.5 (E6.5) with  
189 X1, the clone-derived WT as a positive control, or HBSS to serve as an uninfected control when  
190 evaluating fetal outcome via reabsorption. We assessed fetal outcome in these groups at E13.5  
191 (7 DPI) and found that infection with X1 did not induce fetal reabsorption to the extent WT infection  
192 had (Figure 5B). ZIKV genome quantified with RT-qPCR of RNA isolated from maternal spleen  
193 (Figure 5C) and brain tissue (Figure 5D) showed patterns of X1 and WT infection similar to those  
194 seen in adult *lfnar1*<sup>-/-</sup> mice (Figure 4). No measurable viral genome was detected in the heads of  
195 fetal mice from either infection group at this time point (Figure 5E). However, we found that both  
196 WT and X1 infected the placenta, and WT-infected placenta exhibited significantly higher ZIKV  
197 genome copied,  $10^5$  copies/mg tissue, than X1 infected placental tissue,  $10^3$  copies/mg tissue  
198 (Figure 5F). These findings show for the first time that targeted mutation of xrRNA1 to eliminate  
199 sfRNA1 production results in tissue specific attenuation of ZIKV replication in the placenta.

200

201 **Attenuated X1 ZIKV generates a strong neutralizing antibody response in Transgenic**  
202 **STAT2 mice.** Use of the *lfnar1*<sup>-/-</sup> mouse model has provided us with important insights into the  
203 pathogenesis of our X1 mutant ZIKV, but this is an immunocompromised model which limits  
204 interpretation of attenuation due to the loss of type 1 IFN stimulation. The recently established  
205 mouse model with a knocked-in human STAT2 gene (*hSTAT2 KI*) provided an opportunity to  
206 assess X1 pathogenesis in an immunocompetent animal model [15]. Adult (5-7 weeks old)  
207 *hSTAT2 KI* mice were infected via IP with  $10^4$  FFU of either X1, WT ZIKV, or 100  $\mu$ L of HBSS as  
208 a mock infection control ( $n=6$ ). There was no detectable viral genome in the serum of infected  
209 animals at 2 DPI and no weight loss was observed during acute infection with either WT or X1  
210 ZIKV (Figure 6A). At 20 DPI, we found that ZIKV-reactive IgG antibodies were detectable in the  
211 serum of both WT ZIKV and X1 infected mice (Figure 6B). With an average OD450nm  
212 measurement of 0.56, ZIKV X1 infected mice exhibited significantly higher levels of IgG than those  
213 infected with WT ZIKV (OD450nm 0.38, 2-way ANOVA,  $P \leq 0.002$ , Figure 6B). To determine if  
214 serum from infected animals could neutralize WT ZIKV in comparison to mock infected animals,  
215 we performed a focus-forming unit reduction neutralization test (FRNT). Serum from mock  
216 infected mice did not neutralize or reduce the infectivity of WT ZIKV virions (Figure 6C). The  
217 serum from all animals infected with either X1 or WT ZIKV was able to reduce ZIKV infectivity

218 with Log<sub>10</sub> EC<sub>50</sub> values at -2.98 and -2.88 respectively (Figure 6C). These data illustrate that,  
219 despite the attenuated phenotype of the X1 mutant in *IFNAR1*<sup>-/-</sup> mice, X1 virus produced a strong  
220 neutralizing antibody response comparable to WT ZIKV in the *hSTAT2* *KI* model of ZIKV infection.

221

## 222 **Discussion**

223 We utilized the ZIKV xrRNA1 tertiary structure to construct a mutant with a single  
224 nucleotide change that disrupts xrRNA1 structure and eliminates sfRNA1 production without  
225 significantly altering the sequence of the ZIKV 3'UTR. We show for the first time that targeted  
226 mutation of xrRNA1 results in loss of sfRNA1 production and tissue-specific attenuation of ZIKV  
227 replication in brain tissue and placenta tissue of type 1 interferon receptor knockout mice. Despite  
228 the attenuated phenotype of X1 ZIKV, type 1 interferon receptor knockout mice and transgenic  
229 STAT2 KI mice develop robust antibody responses.

230 Our work has several strengths that add to our current understanding of the role of  
231 xrRNA1-dependent production of sfRNA. Previous studies have shown that sfRNA biogenesis is  
232 necessary to limit RNAi and Toll pathway activation in arthropods, to limit mRNA decay in host  
233 cell cytoplasm, and to impede antiviral type I IFN responses in mammalian cells [4, 7, 10, 16-19].  
234 These previous studies utilized extensive sequence and structural mutation of the 3' UTR or total  
235 elimination of sfRNA1 and sfRNA2 production. Our approach utilized information of the xrRNA1  
236 structure to make mutations that disrupt tertiary structure without significantly altering the  
237 sequence of the 3'UTR. Thus, our findings are directly related to the structure-function  
238 relationships of xrRNA1 and sfRNA1 production.

239 Additionally, the scope of the current published literature includes little information on the  
240 role of xrRNA1-dependent sfRNA1 production in the pathogenesis of flavivirus infections in animal  
241 models. Early investigations with sfRNA1-deficient WNV found that, while this mutation did  
242 attenuate overall infection of immunocompetent mice, there was no alteration of viral load in the  
243 brain or other tissues [2]. Here, we show for the first time that ZIKV xrRNA1 mutation results in  
244 tissue specific attenuation in the brain and placenta in type I IFN receptor knockout mice.  
245 Previous studies have shown that type II and type III IFN responses are critical to the control of  
246 acute RNA virus infections in the brain and placenta, respectively [20-23]. Recent studies  
247 investigating the antiviral response to alphavirus infection of the central nervous system (CNS)  
248 have identified IFN- $\gamma$  and the type II IFN response as being vital for the control of RNA viruses  
249 [20, 24]. Given, that we found differences in type 1 IFN deficient mice, future studies evaluating  
250 the interactions between xrRNA1 mutant ZIKV and type II and III IFN responses will be critical to  
251 fully understand the mechanisms of the sfRNA1 function in different tissues.



252 We also found a novel infection phenotype in pregnant *Ifnar1*<sup>-/-</sup> mice. Numerous mouse  
253 pregnancy infection models have been established to investigate the pathogenesis of congenital  
254 Zika virus syndrome as extensively reviewed by Caine et al [25]. However, there have been no  
255 findings to date studying sfRNA biogenesis and the impact on pathogenesis in murine pregnancy  
256 models of ZIKV. Our initial studies have identified that the sfRNA1-deficient X1 mutant does not  
257 efficiently infect the placenta and exhibited decreased fetal reabsorption compared to WT ZIKV  
258 infection. Since we did not detect virus in fetal brain tissue, these findings also imply that placental  
259 infection plays an important role in ZIKV-induced fetal injury.

260 The lack of detectable clone-derived WT ZIKV or X1 in the fetal head of infected fetuses  
261 identifies an important limitation of this model and corroborates findings that infection with mouse-  
262 adapted ZIKV strains produces more consistent fetal infection than common lab strains [26].  
263 Future studies using mouse-adapted ZIKV or insertion of envelope protein virulence determinants  
264 as recently described along with our identified xrRNA1 mutations would likely provide more  
265 information on the pathogenesis of ZIKV with and without xrRNA1 mutations in fetal tissues [26].

266 The 3'UTR is a common target for attenuation approaches and vaccine development  
267 strategies for flaviviruses though the mechanism for this attenuation is often not well defined [27-  
268 31]. Here we have found that ZIKV containing a targeted mutation in the xrRNA1 structure induces  
269 a strong ZIKV-specific antibody response in both immune-deficient and immunocompetent mouse  
270 models despite the attenuated phenotype. This is especially intriguing given that the xrRNA1  
271 structure altered in our studies is also present in other flaviviruses of global health importance like  
272 DENV and WNV [1, 3, 5, 32]. Future studies targeting specific mutations to the xrRNA1 structure  
273 in other flaviviruses may provide a novel attenuation approaches for vaccine development in ZIKV  
274 as well as other flaviviruses.

275 Previous studies have shown that sfRNA1 deficiency does not alter growth of WNV or  
276 DENV in cultured host cells but does result in reduced CPE and plaque size [6, 12, 33]. Differential  
277 expression of sfRNA isotypes assists in host adaptation for some flaviviruses [32, 34, 35].  
278 However, ZIKV consistently produces equal amounts of sfRNA1 and 2 in both mosquito and  
279 mammalian host cells suggesting that production of a specific sfRNA species is not crucial for  
280 survival in different hosts [1, 35]. We have now shown that sfRNA1-deficient ZIKV X1 virus  
281 displayed reduced ability to replicate in the brain and placenta. These data will provide an  
282 important starting point for future studies that investigate the tissue-specific role of sfRNA1 and  
283 sfRNA2 production during flavivirus infection.

284 In conclusion, we have developed and characterized an sfRNA1-deficient ZIKV virus  
285 through minimal sequence manipulation of a 3'UTR RNA structure and this approach can be

286 utilized to expand understanding of sfRNA function in ZIKV and related flaviviruses. Validation of  
287 this model for disrupting sfRNA production can also be applied to ZIKV xrRNA2 or other xrRNA  
288 structures for other vector-borne flaviviruses. Further studies examining the role of sfRNA1 and  
289 sfRNA2 expression in a tissue specific manner will provide novel insight into the pathogenesis of  
290 flavivirus infections and may provide novel attenuation approaches for vaccine development.

291

## 292 **Materials and Methods**

293 **Cell lines and viruses.** African green monkey kidney epithelial cells (Vero E6), human lung  
294 epithelial cells (A549), and *Aedes albopictus* cells (C6/36) were sourced from the American Type  
295 Culture Collection (ATCC). Vero and C6/36 cells were cultured in Eagle's minimum essential  
296 medium (MEM), A549 cells were cultured in Ham's F-12K medium. Both MEM and Ham's F-12K  
297 medium was supplemented with 1mM sodium pyruvate, 1X non-essential amino acids (100X;  
298 ThermoFisher scientific), 100 U/ml streptomycin, 100 µg/ml streptomycin, 10 mM HEPES, and  
299 10% fetal bovine serum (FBS). Dcr-2-expressing *Aedes albopictus* cells (U4.4) were generously  
300 provided by Dr. Aaron Brault (CDC, Division of Vector-Borne Diseases) and cultured in Mitsuhashi  
301 and Maramorosch insect medium (M&M) supplemented with 10% FBS, 1X non-essential amino  
302 acids, 100 U/ml streptomycin, and 100 µg/ml streptomycin. Mammalian-derived cells were  
303 maintained at 37 °C with 5% CO<sub>2</sub> while *Aedes*-derived cells were maintained at 28 °C with 5%  
304 CO<sub>2</sub>. Viruses used in this study include ZIKV Puerto Rico isolate PRVABC59 (science paper), a  
305 WT clone derived from PRVABC59, and the X1 mutant ZIKV [13].

306 **Plasmids and generation of the X1 mutant.** Previously described pACYC177 vector plasmids  
307 containing ZIKV PRVABC59 genome from either the 5' UTR to nt 3498 (p1-ZIKV) or from nt 3109  
308 to the end of the 3' UTR (p2-ZIKV) were used to generate WT ZIKV or the X1 mutant. Primers  
309 ZIKV X1 C35G F (5'-TCCCCAAGCTGTGCCTGACTAGCAGGC-3') and ZIKV X1 C35G R (5'-  
310 GCCTGCTAGTCAGGCACAGCTTGGGGA-3') were used with a QuikChange II XL Site-Directed  
311 Mutagenesis Kit (Agilent) to introduce the X1 C10415G mutation into the p2-ZIKV plasmid. The  
312 resulting X1 mutant p2-ZIKV, untreated WT p2-ZIKV, and p1-ZIKV plasmids were rescued and  
313 amplified via RCA as described [13]. Prior to *in vitro* transcription of the viral genomes, the  
314 presence of the C10415G mutation in the X1 mutant was confirmed via Sanger sequencing (Eton  
315 Bioscience: San Diego, CA).

316 **Rescue and propagation of ZIKV.** Viral RNA genome for both WT ZIKV and the X1 mutant was  
317 *in vitro* transcribed from ligated plasmid DNA using a HiScribe T7 ARCA mRNA kit (NEB).  
318 Approximately 40 µg of the resulting mRNAs were transfected into Vero cells using  
319 MessengerMAX lipofectamine transfection reagent (Invitrogen). Supernatant was collected from

320 transfected cells once 50-60% cell clearance was observed and spun down to eliminate cell  
321 debris. Clarified supernatant containing the rescued WT or X1 virus was aliquoted stored at -80  
322 °C for later use. Extracellular viral RNA and infectious virus was quantified as detailed below to  
323 evaluate the success of viral rescue. Both rescued WT and X1 viruses were subsequently  
324 passaged once in C6/36 cells to increase viral titer.

325 **Virus quantification.** The amount of cell-free infectious virus in the supernatant of infected cells  
326 was quantified using a focus forming unit assay as previously described [36]. Mouse anti-  
327 Flavivirus group antigen antibody, clone D1-4G2-4-15 (Millipore) was used as primary antibody  
328 and donkey anti-mouse IgG antibody conjugated with horseradish peroxidase (Jackson Research  
329 Laboratories) served as the secondary antibody. Extracellular viral RNA was extracted from the  
330 supernatant of infected cells or serum from infected animals using an E.Z.N.A. viral RNA kit  
331 (Omega Bio-Tek) and used to quantify viral genome present via the following RT-qPCR protocol.  
332 Extracted RNA was reverse transcribed using iScript cDNA synthesis (Bio-Rad). Primers  
333 Zika1087 (5'-CCGCTGCCCAACACAAG-3'), Zika1163c (5'-  
334 CCACTAACGTTCTTTTGCAGACAT-3'), and FAM-tagged probe Zika1108FAM (5'-  
335 AGCCTACCTTGACAAGCAGTCAGACACTCAA-3') were used in combination with a standard  
336 curve spanning  $10^7$  copies/reaction to 1 copy/reaction to quantify ZIKV genome copies via qPCR.  
337 Transformed data were presented as ( $\log_{10}$ ) viral genome copies per microliter.

338 **Northern blot.** Total RNA was isolated from A549 cells infected with either WT or X1 ZIKV and  
339 used to evaluate the presence of sfRNAs via Northern blot as previously described [1].

340 **In vitro viral growth kinetics comparison.**  $2 \times 10^4$  A549 cells or  $4 \times 10^4$  U4.4 cells per well were  
341 seeded in 24-well plates. Cells were infected with either WT or X1 virus at an MOI of 0.1 for 1  
342 hour then washed with 1XPBS to remove extracellular virus before adding back typical cell growth  
343 media. At 0, 24, 48, and 72 hours post infection (HPI) supernatant from infected cells was  
344 collected and used to quantify the amount of infectious virus (via FFU assay) or viral genome (via  
345 RT-qPCR) present.

346 **Animal Studies.** All animal and infectious disease studies were reviewed by the University of  
347 Colorado Institutional Animal Care and Use Committee (IACUC) and Institutional Biosafety  
348 Committee. C57BL/6 *Ifnar1*<sup>-/-</sup> mice purchased from Jackson Laboratories and C57BL/6 mice  
349 expressing human STAT2 protein (*hSTAT2* *KI*) graciously provided by Dr. Michael Diamond  
350 (Washington University School of Medicine) were maintained and bred in specific-pathogen-free  
351 facilities at the University of Colorado Anschutz Medical Campus animal facility. Animals to be  
352 infected were housed in an animal BSL-3 (ABSL-3) laboratory. After infection, mice were

353 observed daily for signs of disease, weight loss, or other terminal indicators until the experiment  
354 endpoint.

355 **Characterization of infection in adult *Ifnar1*<sup>-/-</sup> mice.** Similar numbers of male and female 5-7  
356 week old *Ifnar1*<sup>-/-</sup> mice were intraperitoneally infected with 1×10<sup>4</sup> FFU of either X1, WT-clone,  
357 PRVABC59 ZIKV or 100µL of HBSS as a mock infection. Mouse weight was measured daily until  
358 endpoint and serum was collected from a retro-orbital bleed 2 days post infection (DPI) to quantify  
359 viremia during early infection via RT-qPCR. At 4, 6, and 8 DPI, a cohort of mice were euthanized  
360 with isoflurane and perfused with 20 ml PBS before brain and spleen tissues were collected.  
361 Tissues were stored in RNAlater solution (ThermoFisher) at 4 °C until processing. To evaluate  
362 the presence of ZIKV-reactive IgG, mice were euthanized with isoflurane at 20 DPI and blood was  
363 collected via cardiac puncture. Serum extracted from these blood samples was stored at -80 °C  
364 until use.

365 **Infection in pregnant *Ifnar1*<sup>-/-</sup> mice.** Superovulation was induced in female *Ifnar1*<sup>-/-</sup> mice aged  
366 10-12 weeks as previously described [37]. Dams were mated with *Ifnar1*<sup>-/-</sup> sires for approximately  
367 16 hours and then separated (E0.5). At E6.5, dams were infected intraperitoneally with 1×10<sup>4</sup>  
368 FFU of either X1 or WT ZIKV or 100 µL HBSS as a mock infection. 7 DPI on E13.5, mice were  
369 sacrificed using isoflurane, perfused with 20 ml PBS, and maternal brain and spleen were  
370 collected. Fetal outcome was assessed by number of fetuses and resorptions present and fetal  
371 head and placenta were collected to determine viral burden. All samples were stored in RNAlater  
372 solution (ThermoFisher) at 4 °C until processing.

373 **Tissue viral load by RT-qPCR.** Tissues collected from infected mice were normalized by weight  
374 and mechanically homogenized in TRIzol (ThermoFisher) using a BeadBug instrument  
375 (Benchmark Scientific). A standard TRIzol/chloroform RNA isolation protocol was used to reduce  
376 lipid contamination [38]. Total RNA was then isolated from the resulting aqueous layer using an  
377 E.Z.N.A. total RNA I kit (Omega Bio-Tek). An iScript gDNA clear cDNA synthesis kit (Bio-Rad)  
378 was used to reverse transcribe 1000 ng of RNA isolated from infected tissues. The resulting cDNA  
379 was used to quantify the amount of ZIKV genome present by qPCR.

380 **Infection of adult HuSTAT2 mice.** Male and female 5-7 week old HuSTAT2 mice were infected  
381 intraperitoneally with 1×10<sup>4</sup> FFU of either X1 or WT ZIKV or 100 µL HBSS as a mock infection.  
382 Weight of infected animals was monitored daily. Mice were euthanized with isoflurane at 20 DPI  
383 and blood was collected via cardiac puncture. Serum isolated from blood samples was used to  
384 determine the amount of ZIKV-reactive IgG present via indirect ELISA as well as viral  
385 neutralization by focus reduction neutralization test (FRNT).

386 **ZIKV-reactive IgG ELISA.** Immulon 4HBX 96-well ELISA plates (ThermoFisher) were coated  
387 overnight at 4 °C with 200ng/well of ZIKV virus particles diluted in PBS (pH 7.4). Plates were  
388 blocked with SuperBlock (ThermoFisher) at room temperature for 1.5 hours then washed once  
389 with PBS-T (0.05% Tween 20). Sera from infected animals was serially diluted in PBS-T and  
390 incubated on the plate for 1.5 hours at room temperature then washed 3 times with PBS-T.  
391 Horseradish peroxidase-conjugated donkey anti-mouse IgG antibody (Jackson Research  
392 Laboratories) was diluted 1:4,000 and incubated on the plate for 45 minutes then washed 6 times  
393 with PBS-T. TMB substrate (ThermoFisher) was added to the plate and allowed to develop for 3  
394 minutes before 0.3N H<sub>2</sub>SO<sub>4</sub> was added to stop the reaction. ELISA absorbance was read at  
395 450nm for 0.1 second on a Victor X5 plate reader (PerkinElmer).

396 **FRNT measurement of serum neutralization.** 1×10<sup>4</sup> Vero cells per well were seeded onto  
397 opaque Nunc-immuno 96-well plates (MilliporeSigma). Heat-inactivated sera from infected  
398 animals was serially diluted and then incubated with WT ZIKV at a concentration of 10 FFU per  
399 well at 37 °C for one hour. The resulting serum-treated virus was then used to infect the plated  
400 Vero cells for one hour at 37 °C. Cells were then overlaid with a 1:1 mixture of 2.5% Avicel  
401 (MilliporeSigma) and complete 2×MEM medium and incubated at 37 °C for 48 hours. After  
402 incubation, the cells were fixed with 4% PFA then washed with PBS and stored at 4 °C until  
403 staining. The presence of ZIKV in infected cells was detected with a mouse anti-flavivirus 4G2  
404 primary antibody (Millipore) and a donkey anti-mouse IgG horseradish peroxidase-conjugated  
405 secondary antibody (Jackson Research Laboratories) as previously described [36]. A nonlinear  
406 regression analysis was used to determine the plasma dilution factor at which 50% ZIKV  
407 neutralization occurs compared to an untreated control.

408 **Statistical analysis.** GraphPad Prism 7 software (GraphPad Software) was used to analyze all  
409 data. Differences were considered statistically significant if  $P < 0.05$ . Specific statistical analysis  
410 methods are detailed in the figure legends of experimental results.

411

#### 412 **Acknowledgements:**

413 We thank Dana Fader and Aaron Massey for research assistance and support during the  
414 preparation of this data. We also thank Michael S. Diamond and the Washington University  
415 School of Medicine in St. Louis for providing the *hSTAT2* *KI* mice.

416

417 This work was supported by DOD PRMRP funding (contract W81XWH-17-1-0183) and VA Merit  
418 Funding (I01BX003863) and to J.D.B.

419



420 We declare that we have no conflicts of interest.

421

422

## 423 References

- 424 1. Akiyama, B. M.; Laurence, H. M.; Massey, A. R.; Costantino, D. A.; Xie, X.; Yang, Y.; Shi, P. Y.; Nix,  
425 J. C.; Beckham, J. D.; Kieft, J. S., Zika virus produces noncoding RNAs using a multi-pseudoknot  
426 structure that confounds a cellular exonuclease. *Science* **2016**, 354, (6316), 1148-1152.
- 427 2. Pijlman, G. P.; Funk, A.; Kondratieva, N.; Leung, J.; Torres, S.; van der Aa, L.; Liu, W. J.;  
428 Palmenberg, A. C.; Shi, P. Y.; Hall, R. A.; Khromykh, A. A., A highly structured, nuclease-resistant,  
429 noncoding RNA produced by flaviviruses is required for pathogenicity. *Cell Host Microbe* **2008**, 4,  
430 (6), 579-91.
- 431 3. Chapman, E. G.; Costantino, D. A.; Rabe, J. L.; Moon, S. L.; Wilusz, J.; Nix, J. C.; Kieft, J. S., The  
432 structural basis of pathogenic subgenomic flavivirus RNA (sfRNA) production. *Science* **2014**, 344,  
433 (6181), 307-10.
- 434 4. Chang, R. Y.; Hsu, T. W.; Chen, Y. L.; Liu, S. F.; Tsai, Y. J.; Lin, Y. T.; Chen, Y. S.; Fan, Y. H., Japanese  
435 encephalitis virus non-coding RNA inhibits activation of interferon by blocking nuclear  
436 translocation of interferon regulatory factor 3. *Vet Microbiol* **2013**, 166, (1-2), 11-21.
- 437 5. Chapman, E. G.; Moon, S. L.; Wilusz, J.; Kieft, J. S., RNA structures that resist degradation by Xrn1  
438 produce a pathogenic Dengue virus RNA. *Elife* **2014**, 3, e01892.
- 439 6. Goertz, G. P.; Fros, J. J.; Miesen, P.; Vogels, C. B. F.; van der Bent, M. L.; Geertsema, C.;  
440 Koenraadt, C. J. M.; van Rij, R. P.; van Oers, M. M.; Pijlman, G. P., Noncoding Subgenomic  
441 Flavivirus RNA Is Processed by the Mosquito RNA Interference Machinery and Determines West  
442 Nile Virus Transmission by *Culex pipiens* Mosquitoes. *J Virol* **2016**, 90, (22), 10145-10159.
- 443 7. Moon, S. L.; Dodd, B. J.; Brackney, D. E.; Wilusz, C. J.; Ebel, G. D.; Wilusz, J., Flavivirus sfRNA  
444 suppresses antiviral RNA interference in cultured cells and mosquitoes and directly interacts  
445 with the RNAi machinery. *Virology* **2015**, 485, 322-9.
- 446 8. Schnettler, E.; Sterken, M. G.; Leung, J. Y.; Metz, S. W.; Geertsema, C.; Goldbach, R. W.; Vlak, J.  
447 M.; Kohl, A.; Khromykh, A. A.; Pijlman, G. P., Noncoding flavivirus RNA displays RNA interference  
448 suppressor activity in insect and mammalian cells. *J Virol* **2012**, 86, (24), 13486-500.
- 449 9. Schnettler, E.; Tykalova, H.; Watson, M.; Sharma, M.; Sterken, M. G.; Obbard, D. J.; Lewis, S. H.;  
450 McFarlane, M.; Bell-Sakyi, L.; Barry, G.; Weisheit, S.; Best, S. M.; Kuhn, R. J.; Pijlman, G. P.; Chase-  
451 Topping, M. E.; Gould, E. A.; Grubhoffer, L.; Fazakerley, J. K.; Kohl, A., Induction and suppression  
452 of tick cell antiviral RNAi responses by tick-borne flaviviruses. *Nucleic Acids Res* **2014**, 42, (14),  
453 9436-46.
- 454 10. Schuessler, A.; Funk, A.; Lazear, H. M.; Cooper, D. A.; Torres, S.; Daffis, S.; Jha, B. K.; Kumagai, Y.;  
455 Takeuchi, O.; Hertzog, P.; Silverman, R.; Akira, S.; Barton, D. J.; Diamond, M. S.; Khromykh, A. A.,  
456 West Nile virus noncoding subgenomic RNA contributes to viral evasion of the type I interferon-  
457 mediated antiviral response. *J Virol* **2012**, 86, (10), 5708-18.
- 458 11. Pallares, H. M.; Costa Navarro, G. S.; Villordo, S. M.; Merwaiss, F.; de Borja, L.; Gonzalez Lopez  
459 Ledesma, M. M.; Ojeda, D. S.; Henrion-Lacritick, A.; Morales, M. A.; Fabri, C.; Saleh, M. C.;  
460 Gamarnik, A. V., Zika Virus Subgenomic Flavivirus RNA Generation Requires Cooperativity  
461 between Duplicated RNA Structures That Are Essential for Productive Infection in Human Cells. *J*  
462 *Virol* **2020**, 94, (18).
- 463 12. Liu, Y.; Liu, H.; Zou, J.; Zhang, B.; Yuan, Z., Dengue virus subgenomic RNA induces apoptosis  
464 through the Bcl-2-mediated PI3k/Akt signaling pathway. *Virology* **2014**, 448, 15-25.



- 465 13. Weger-Lucarelli, J.; Duggal, N. K.; Bullard-Feibelman, K.; Veselinovic, M.; Romo, H.; Nguyen, C.;  
466 Ruckert, C.; Brault, A. C.; Bowen, R. A.; Stenglein, M.; Geiss, B. J.; Ebel, G. D., Development and  
467 Characterization of Recombinant Virus Generated from a New World Zika Virus Infectious Clone.  
468 *J Virol* **2017**, 91, (1).
- 469 14. Lazear, H. M.; Govero, J.; Smith, A. M.; Platt, D. J.; Fernandez, E.; Miner, J. J.; Diamond, M. S., A  
470 Mouse Model of Zika Virus Pathogenesis. *Cell Host Microbe* **2016**, 19, (5), 720-30.
- 471 15. Gorman, M. J.; Caine, E. A.; Zaitsev, K.; Begley, M. C.; Weger-Lucarelli, J.; Uccellini, M. B.;  
472 Tripathi, S.; Morrison, J.; Yount, B. L.; Dinno, K. H., 3rd; Ruckert, C.; Young, M. C.; Zhu, Z.;  
473 Robertson, S. J.; McNally, K. L.; Ye, J.; Cao, B.; Mysorekar, I. U.; Ebel, G. D.; Baric, R. S.; Best, S.  
474 M.; Artyomov, M. N.; Garcia-Sastre, A.; Diamond, M. S., An Immunocompetent Mouse Model of  
475 Zika Virus Infection. *Cell Host Microbe* **2018**, 23, (5), 672-685 e6.
- 476 16. Moon, S. L.; Anderson, J. R.; Kumagai, Y.; Wilusz, C. J.; Akira, S.; Khromykh, A. A.; Wilusz, J., A  
477 noncoding RNA produced by arthropod-borne flaviviruses inhibits the cellular exoribonuclease  
478 XRN1 and alters host mRNA stability. *RNA* **2012**, 18, (11), 2029-40.
- 479 17. Manokaran, G.; Finol, E.; Wang, C.; Gunaratne, J.; Bahl, J.; Ong, E. Z.; Tan, H. C.; Sessions, O. M.;  
480 Ward, A. M.; Gubler, D. J.; Harris, E.; Garcia-Blanco, M. A.; Ooi, E. E., Dengue subgenomic RNA  
481 binds TRIM25 to inhibit interferon expression for epidemiological fitness. *Science* **2015**, 350,  
482 (6257), 217-21.
- 483 18. Donald, C. L.; Brennan, B.; Cumberworth, S. L.; Rezelj, V. V.; Clark, J. J.; Cordeiro, M. T.; Freitas de  
484 Oliveira Franca, R.; Pena, L. J.; Wilkie, G. S.; Da Silva Filipe, A.; Davis, C.; Hughes, J.; Varjak, M.;  
485 Selinger, M.; Zuvanov, L.; Owsianka, A. M.; Patel, A. H.; McLauchlan, J.; Lindenbach, B. D.; Fall,  
486 G.; Sall, A. A.; Biek, R.; Rehwinkel, J.; Schnettler, E.; Kohl, A., Full Genome Sequence and sfRNA  
487 Interferon Antagonist Activity of Zika Virus from Recife, Brazil. *PLoS Negl Trop Dis* **2016**, 10, (10),  
488 e0005048.
- 489 19. Bidet, K.; Dadlani, D.; Garcia-Blanco, M. A., G3BP1, G3BP2 and CAPRIN1 are required for  
490 translation of interferon stimulated mRNAs and are targeted by a dengue virus non-coding RNA.  
491 *PLoS Pathog* **2014**, 10, (7), e1004242.
- 492 20. Baxter, V. K.; Griffin, D. E., Interferon gamma modulation of disease manifestation and the local  
493 antibody response to alphavirus encephalomyelitis. *J Gen Virol* **2016**, 97, (11), 2908-2925.
- 494 21. Bayer, A.; Lennemann, N. J.; Ouyang, Y.; Bramley, J. C.; Morosky, S.; Marques, E. T., Jr.; Cherry,  
495 S.; Sadovsky, Y.; Coyne, C. B., Type III Interferons Produced by Human Placental Trophoblasts  
496 Confer Protection against Zika Virus Infection. *Cell Host Microbe* **2016**, 19, (5), 705-12.
- 497 22. Binder, G. K.; Griffin, D. E., Interferon-gamma-mediated site-specific clearance of alphavirus  
498 from CNS neurons. *Science* **2001**, 293, (5528), 303-6.
- 499 23. Jagger, B. W.; Miner, J. J.; Cao, B.; Arora, N.; Smith, A. M.; Kovacs, A.; Mysorekar, I. U.; Coyne, C.  
500 B.; Diamond, M. S., Gestational Stage and IFN-lambda Signaling Regulate ZIKV Infection In Utero.  
501 *Cell Host Microbe* **2017**, 22, (3), 366-376 e3.
- 502 24. Baxter, V. K.; Griffin, D. E., Interferon-Gamma Modulation of the Local T Cell Response to  
503 Alphavirus Encephalomyelitis. *Viruses* **2020**, 12, (1).
- 504 25. Caine, E. A.; Jagger, B. W.; Diamond, M. S., Animal Models of Zika Virus Infection during  
505 Pregnancy. *Viruses* **2018**, 10, (11).
- 506 26. Carbaugh, D. L.; Zhou, S.; Sanders, W.; Moorman, N. J.; Swanstrom, R.; Lazear, H. M., Two  
507 genetic differences between closely-related Zika virus strains determine pathogenic outcome in  
508 mice. *J Virol* **2020**.
- 509 27. Shan, C.; Muruato, A. E.; Jagger, B. W.; Richner, J.; Nunes, B. T. D.; Medeiros, D. B. A.; Xie, X.;  
510 Nunes, J. G. C.; Morabito, K. M.; Kong, W. P.; Pierson, T. C.; Barrett, A. D.; Weaver, S. C.; Rossi, S.  
511 L.; Vasconcelos, P. F. C.; Graham, B. S.; Diamond, M. S.; Shi, P. Y., A single-dose live-attenuated

- 512 vaccine prevents Zika virus pregnancy transmission and testis damage. *Nat Commun* **2017**, *8*,  
513 (1), 676.
- 514 28. Shan, C.; Muruato, A. E.; Nunes, B. T. D.; Luo, H.; Xie, X.; Medeiros, D. B. A.; Wakamiya, M.; Tesh,  
515 R. B.; Barrett, A. D.; Wang, T.; Weaver, S. C.; Vasconcelos, P. F. C.; Rossi, S. L.; Shi, P. Y., A live-  
516 attenuated Zika virus vaccine candidate induces sterilizing immunity in mouse models. *Nat Med*  
517 **2017**, *23*, (6), 763-767.
- 518 29. Zou, J.; Xie, X.; Luo, H.; Shan, C.; Muruato, A. E.; Weaver, S. C.; Wang, T.; Shi, P. Y., A single-dose  
519 plasmid-launched live-attenuated Zika vaccine induces protective immunity. *EBioMedicine* **2018**,  
520 *36*, 92-102.
- 521 30. Beck, A.; Tesh, R. B.; Wood, T. G.; Widen, S. G.; Ryman, K. D.; Barrett, A. D., Comparison of the  
522 live attenuated yellow fever vaccine 17D-204 strain to its virulent parental strain Asibi by deep  
523 sequencing. *J Infect Dis* **2014**, *209*, (3), 334-44.
- 524 31. Blaney, J. E., Jr.; Sathe, N. S.; Goddard, L.; Hanson, C. T.; Romero, T. A.; Hanley, K. A.; Murphy, B.  
525 R.; Whitehead, S. S., Dengue virus type 3 vaccine candidates generated by introduction of  
526 deletions in the 3' untranslated region (3'-UTR) or by exchange of the DENV-3 3'-UTR with that  
527 of DENV-4. *Vaccine* **2008**, *26*, (6), 817-28.
- 528 32. Kieft, J. S.; Rabe, J. L.; Chapman, E. G., New hypotheses derived from the structure of a flaviviral  
529 Xrn1-resistant RNA: Conservation, folding, and host adaptation. *RNA Biol* **2015**, *12*, (11), 1169-  
530 77.
- 531 33. Funk, A.; Truong, K.; Nagasaki, T.; Torres, S.; Floden, N.; Balmori Melian, E.; Edmonds, J.; Dong,  
532 H.; Shi, P. Y.; Khromykh, A. A., RNA structures required for production of subgenomic flavivirus  
533 RNA. *J Virol* **2010**, *84*, (21), 11407-17.
- 534 34. Villordo, S. M.; Filomatori, C. V.; Sanchez-Vargas, I.; Blair, C. D.; Gamarnik, A. V., Dengue virus  
535 RNA structure specialization facilitates host adaptation. *PLoS Pathog* **2015**, *11*, (1), e1004604.
- 536 35. Filomatori, C. V.; Carballeda, J. M.; Villordo, S. M.; Aguirre, S.; Pallares, H. M.; Maestre, A. M.;  
537 Sanchez-Vargas, I.; Blair, C. D.; Fabri, C.; Morales, M. A.; Fernandez-Sesma, A.; Gamarnik, A. V.,  
538 Dengue virus genomic variation associated with mosquito adaptation defines the pattern of viral  
539 non-coding RNAs and fitness in human cells. *PLoS Pathog* **2017**, *13*, (3), e1006265.
- 540 36. Brien, J. D.; Lazear, H. M.; Diamond, M. S., Propagation, quantification, detection, and storage of  
541 West Nile virus. *Curr Protoc Microbiol* **2013**, *31*, 15D 3 1-15D 3 18.
- 542 37. Luo, C.; Zuniga, J.; Edison, E.; Palla, S.; Dong, W.; Parker-Thornburg, J., Superovulation strategies  
543 for 6 commonly used mouse strains. *J Am Assoc Lab Anim Sci* **2011**, *50*, (4), 471-8.
- 544 38. Rio, D. C.; Ares, M., Jr.; Hannon, G. J.; Nilsen, T. W., Purification of RNA using TRIzol (TRI  
545 reagent). *Cold Spring Harb Protoc* **2010**, *2010*, (6), pdb prot5439.

546

547

548 **Figure 1**

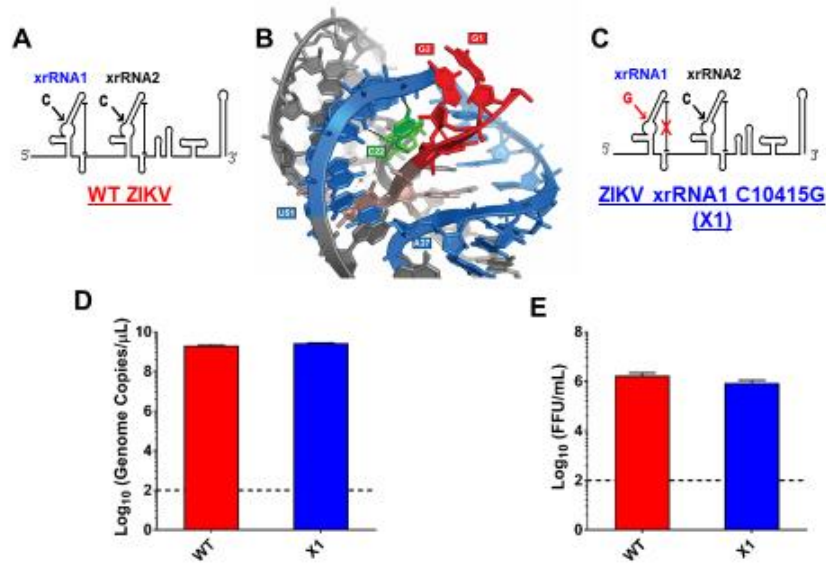

549

550 **Figure 1** Development of infectious ZIKV with discrete xrRNA1 structural mutation. (A) The 3'  
551 UTR of ZIKV encodes two host exoribonuclease resistant RNA structures (xrRNAs). (B) The  
552 tertiary structure of ZIKV xrRNA1 has been previously described, revealing that a single cytosine  
553 at position 10415 (green) of the crystalized RNA fragment is necessary for stabilizing the  
554 phosphate backbone kink (blue) which protects the viral 3' UTR (red) from exoribonuclease  
555 degradation. We produced a ZIKV mutant (called X1) in which the cytosine at position 10415 of  
556 xrRNA1 has been replaced with a guanine (C), weakening the tertiary structure of the RNA. A  
557 wild type (WT) ZIKV clone with no mutations (A) was also produced alongside the X1 mutant as  
558 a positive control. The viral genomes of either X1 or the WT clone were transfected into Vero  
559 cells. At 12 days post transfection, the amounts of both viral genome (D) and infectious virus (E)  
560 rescued from the X1 transfection were comparable to those rescued from cells transfected with  
561 WT ZIKV RNA ( $n=6$ ).

562

563 **Figure 2**

564

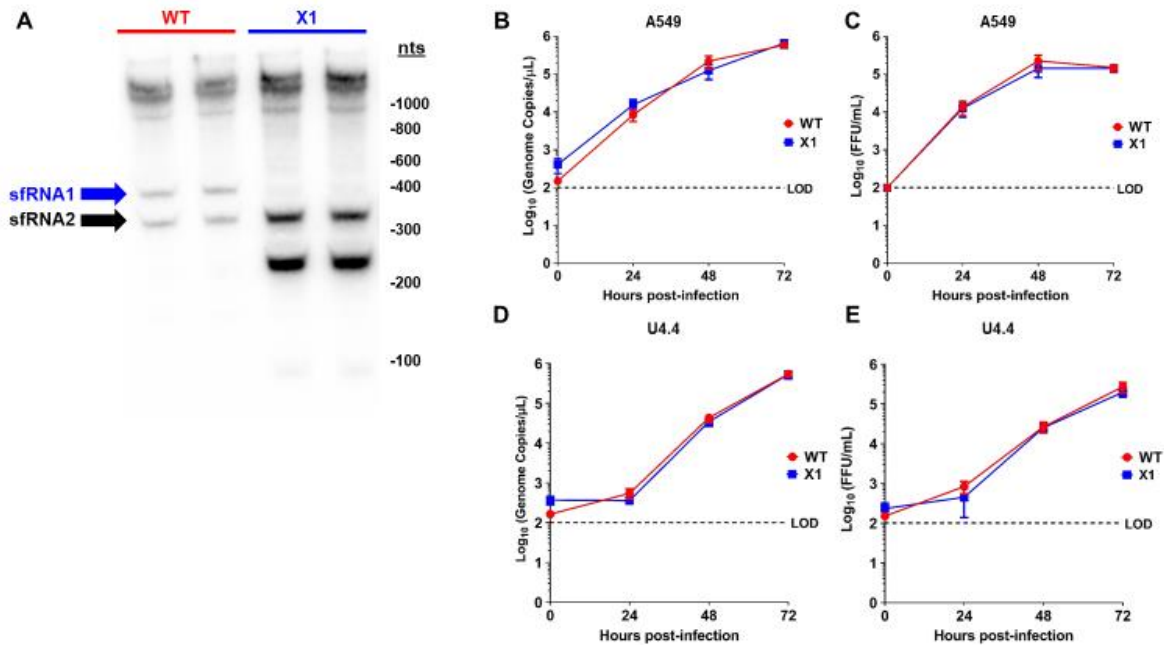

565

566 **Figure 2** *In vitro* sfRNA production and viral growth kinetics of X1 compared to WT ZIKV Clone.  
567 (A) A549 cells were infected with either X1 or WT Clone at an MOI of 1. At 48 hpi, cellular RNA  
568 was collected and the presence of ZIKV sfRNAs was detected via Northern blot using a ZIKV  
569 3'UTR-specific probe. To analyze viral growth kinetics, human A549 cells (B-C) or *Aedes*  
570 *albopictus* U4.4 cells (D-E) were infected with X1 or WT at an MOI of 0.1. At 0, 24, 48, and 72  
571 hpi, supernatant was collected and used to measure either extracellular viral RNA via RT-qPCR  
572 (B, D) or infectious virus via FFU assay (C, E). (B-E) Dashed lines represent the limit of detection  
573 (LOD). Error bars indicate standard error of the mean for six replicates across two independent  
574 experiments. ( $n=6$ , NS by two-way ANOVA).

575

576

577 **Figure 3**

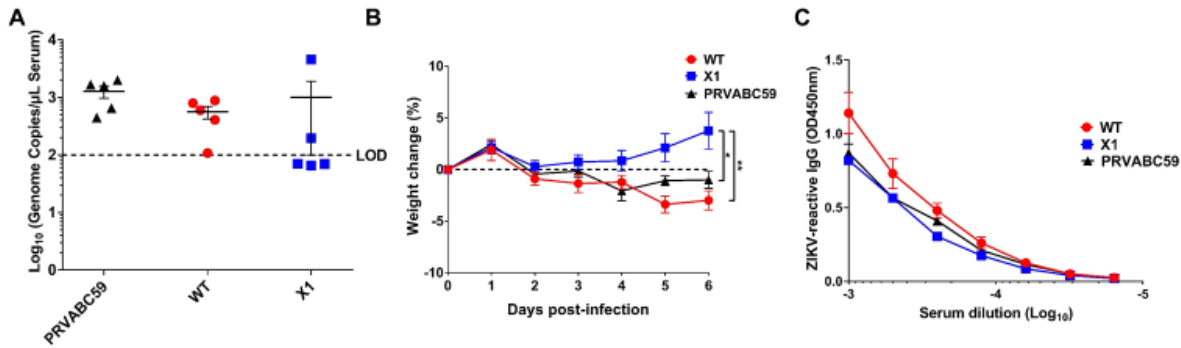

578

579 **Figure 3** X1 infection compared to WT Clone and ZIKV PRVABC59 in adult *IFNAR1*<sup>-/-</sup> mice. Male  
580 and female *IFNAR1*<sup>-/-</sup> mice 5-7 weeks in age were infected IP with 1e4 FFU of X1, WT ZIKV  
581 Clone, or PRVABC59 virus. (A) Serum samples were collected via RO bleed at 2 dpi to quantify  
582 early viral infection. RNA was isolated from the sera and used to detect ZIKV genome via RT-  
583 qPCR. Dotted line represents the limit of detection (LOD), no significant differences were found  
584 using Mann-Whitney tests to compare between viral infections ( $n=5$ ). (B) The weight of infected  
585 mice was monitored during acute infection and shown here as percent weight change relative to  
586 baseline set at 0 dpi. Dotted line symbolizes 0% weight change. Two-way ANOVA was used to  
587 make multiple comparisons at each time point, asterisks representative of the following: \*,X1 vs  
588 PRVABC59:  $P=0.0464$  at 5 dpi and  $P=0.0014$  at 6 dpi. \*\*,X1 vs WT:  $P<0.0001$  at 5 and 6 dpi.  
589 ( $n=5$ ). (C) Serum was collected via cardiac stick at 20 dpi to detect a ZIKV-reactive antibody  
590 response. ZIKV-reactive IgG was detected by indirect ELISA using ZIKV virions as antigen and  
591 donkey  $\alpha$  mouse IgG HRP conjugate as detecting antibody. Data shown as optical density (OD)  
592 at various serum dilutions, normalized with uninfected mouse sera ( $n=2$ , NS).

593

594

595 **Figure 4**

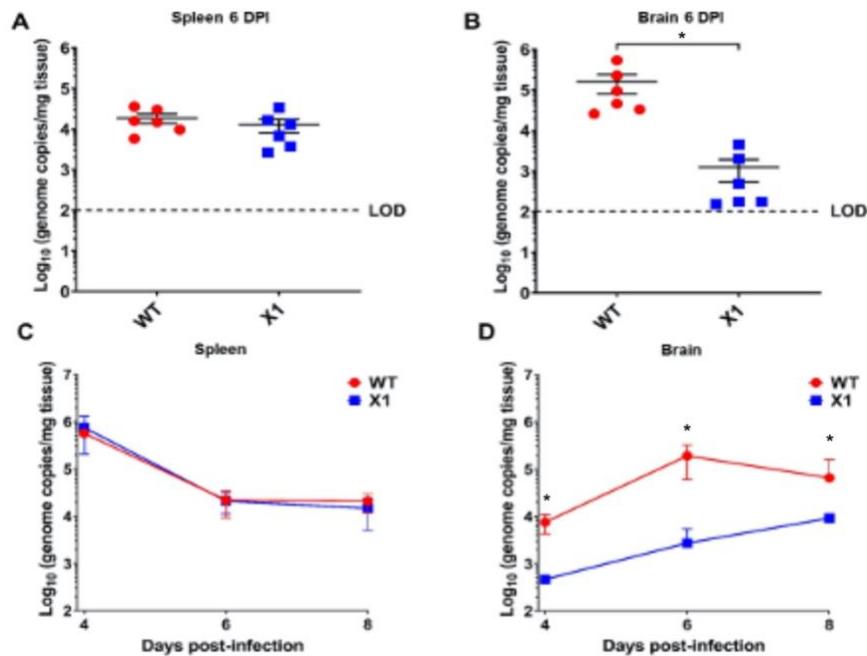

596

597 **Figure 4.** X1 ZIKV exhibits tissue-specific attenuated viral replication in *IFNAR1*<sup>-/-</sup> mice. Male  
598 and female mice were infected with 1e4 FFU (IP) of either WT or X1 virus. At the indicated days  
599 post-infection, mice were sacrificed and perfused with PBS before harvest of spleen (A, C) and  
600 brain tissue (B, D). Total RNA was isolated from the tissue and used to quantify ZIKV genome via  
601 RT-qPCR. Dotted line represents the limit of detection (LOD). Error bars indicate standard error  
602 of the mean for six replicates across two independent experiments. [ $n=6$  per group,  $*P=0.003$  by  
603 Mann-Whitney test (B) and two-way ANOVA (D)].

604

605



606 **Figure 5**

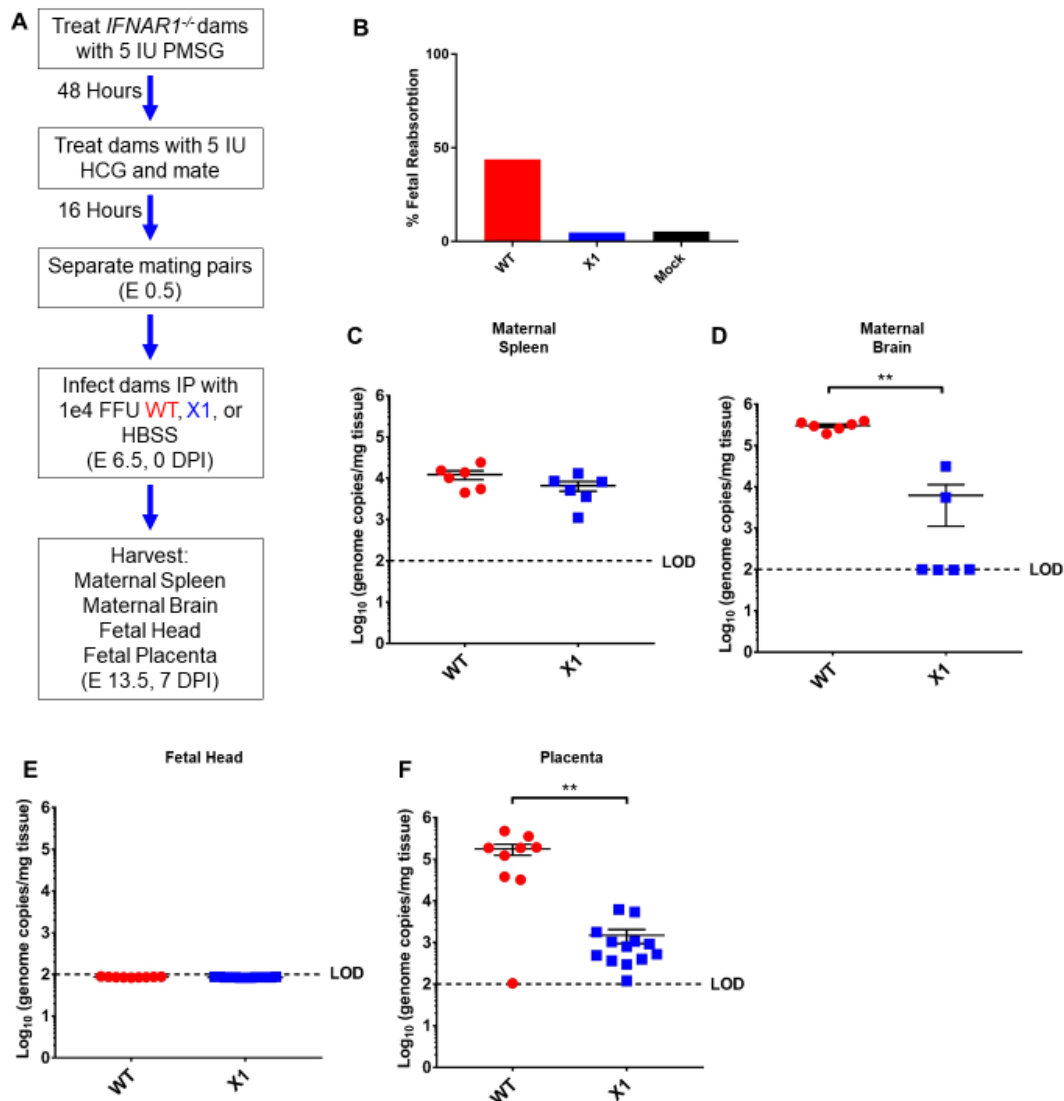

607

608

609 **Figure 5** Fetal outcome and viral burden in pregnant *IFNAR1*<sup>-/-</sup> mice infected with either WT or  
610 X1 ZIKV. (A) Superovulation was induced in 10-12 week old *IFNAR1*<sup>-/-</sup> dams which were then  
611 mated with *IFNAR1*<sup>-/-</sup> sires. Dams were then infected IP with either 1e4 FFU of WT ZIKV clone,  
612 the X1 mutant, or 100 ul HBSS at E 6.5. At E 13.5, 7 DPI dams were sacrificed and perfused with  
613 PBS. Fetal outcome was assessed and is shown % fetal reabsorption (B). Maternal spleen (C),  
614 maternal brain (D) were collected to assess viral burden in these tissues by RT-qPCR of ZIKV  
615 genome ( $n=6$ ,  $**P<0.01$  via Mann-Whitney Test). Fetal head (E), and placenta (F) were also  
616 collected to assess viral burden via detection of ZIKV genome (WT  $n=9$ , X1  $n=13$ ,  $**P<0.01$  via  
617 Mann-Whitney Test). Fetal data representative of 9-13 fetuses from 3 pregnant dams for each  
618 infection. Dotted line shows limit if detection (LOD) for the assay, error bars indicate the standard  
619 error of the mean for these experiments.

620 **Figure 6**

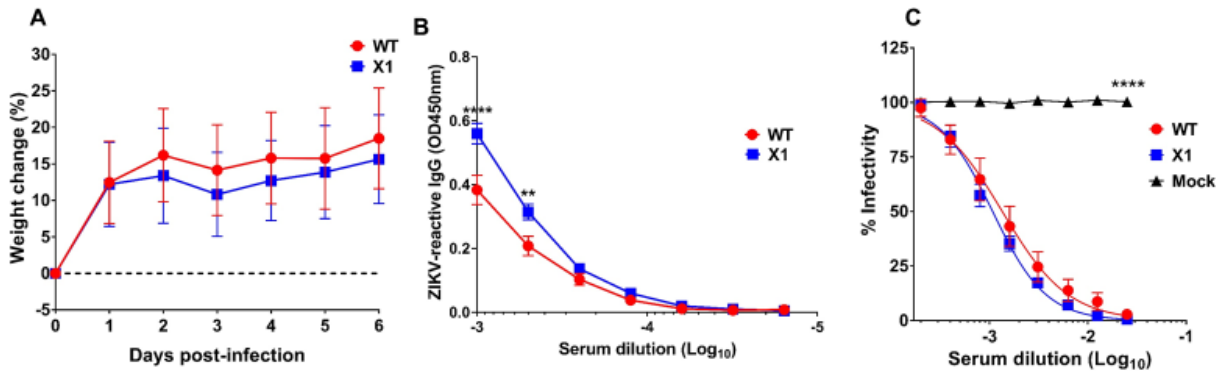

621

622 **Figure 6** Outcomes of X1 infection compared to WT in HuSTAT2 mice. Male and female  
623 HuSTAT2 mice 5-7 weeks in age were infected IP with 1e4 FFU of X1, WT ZIKV Clone, or HBSS  
624 as a mock infection. (A) Mouse weight was monitored during acute infection and shown here as  
625 percent weight change relative to baseline set at 0 dpi. Dotted line symbolizes 0% weight change  
626 with no significant differences detected via two-way ANOVA. (B) Serum was collected via cardiac  
627 stick at 20 dpi to detect a ZIKV-reactive antibody response. ZIKV-reactive IgG was detected by  
628 indirect ELISA using ZIKV virions as antigen and donkey  $\alpha$  mouse IgG HRP conjugate as  
629 detecting antibody. Data shown as optical density (OD) at various serum dilutions, normalized  
630 with mock infected mouse sera. (C) Serum from 20 dpi was also used to detect neutralization of  
631 ZIKV via focus reduction neutralization test (FRNT). Results are shown here as change in percent  
632 infectivity of ZIKV compared to untreated ZIKV. All data representative of six replicates across  
633 two independent experiments, error bars indicate standard error of the mean. ( $n=6$ , \*\*\*\*  $P<0.0001$ ,  
634 \*\* $P=0.002$  via two-way ANOVA).

635
